# Supplementary material
Source: MDPI journal article supplement (https://www.mdpi.com/2306-5729/1/2/12)

# A Spectral Emissivity Library of Spoil Substrates

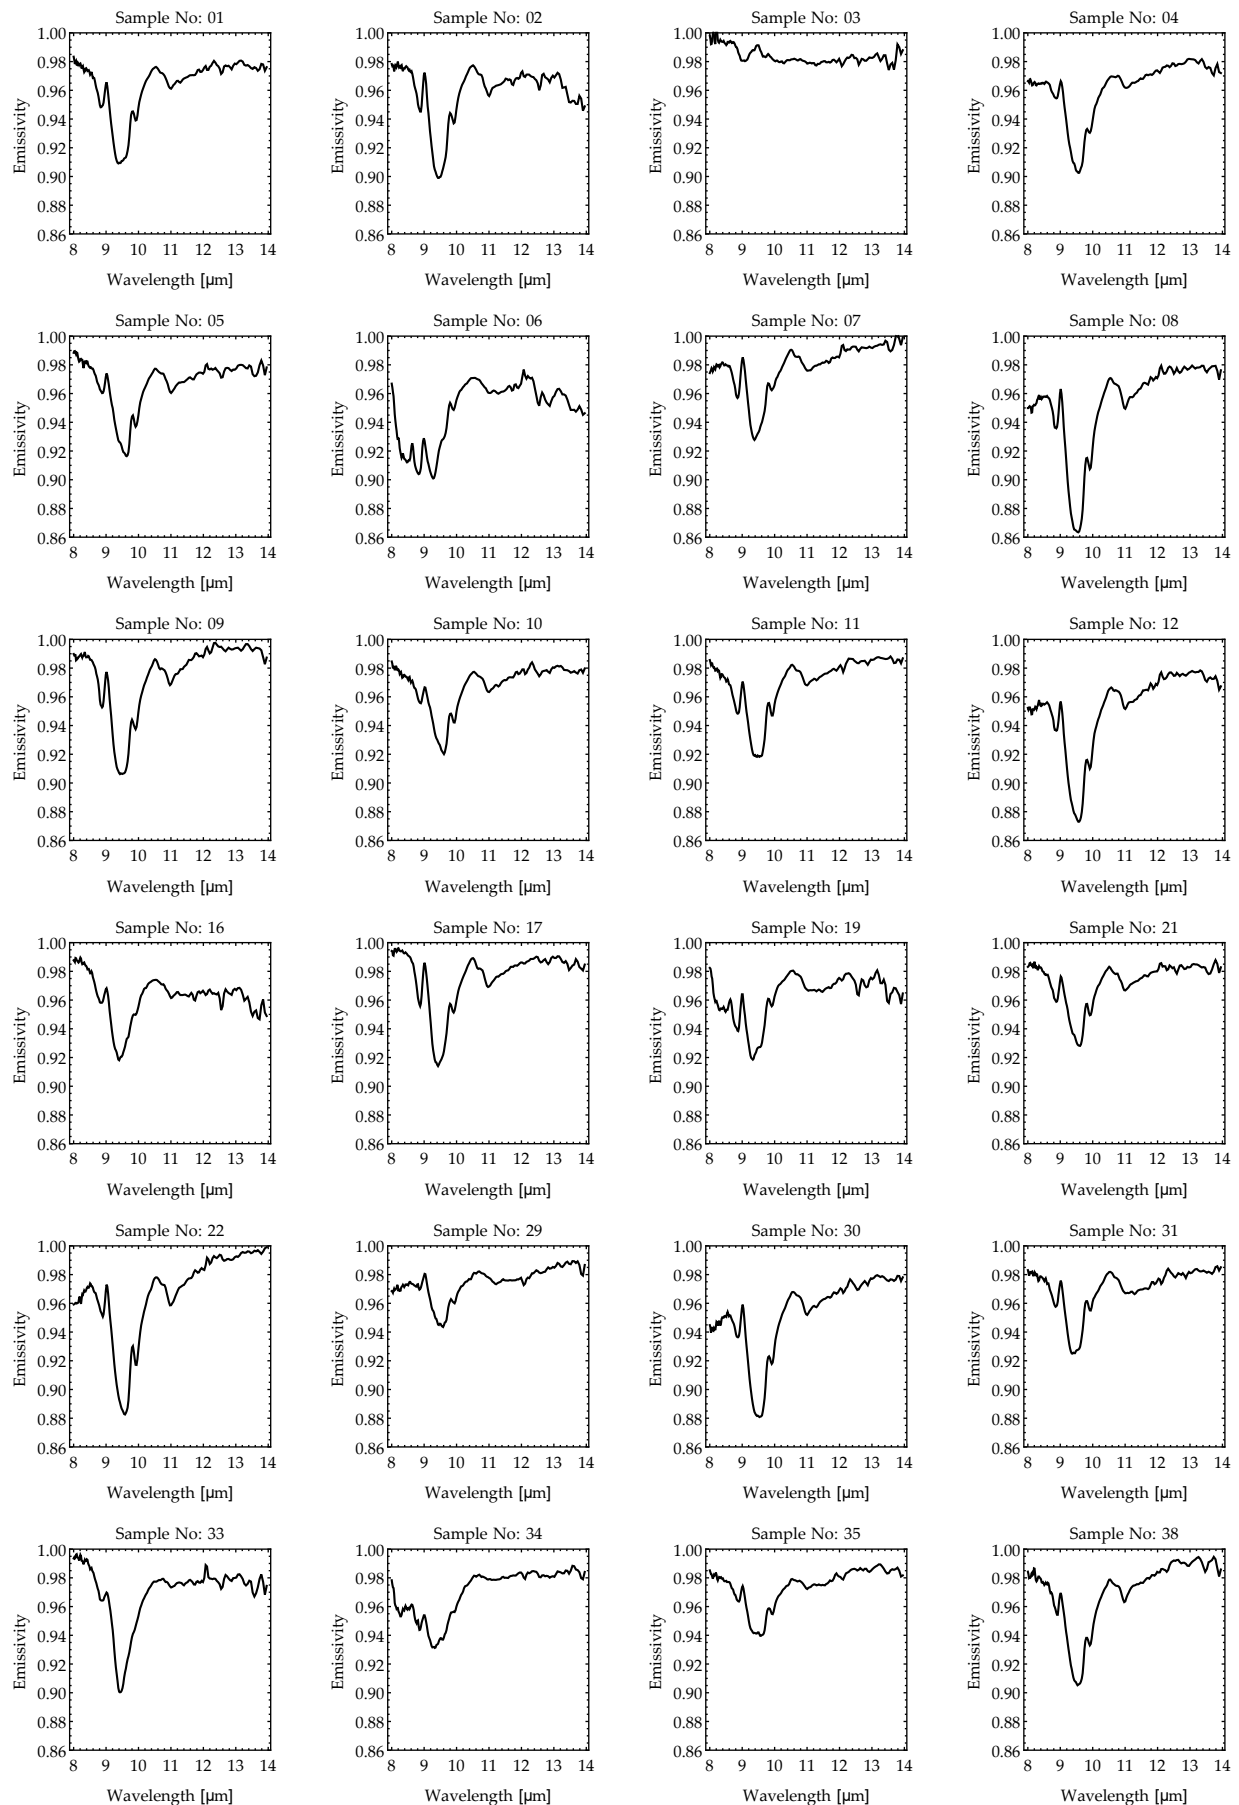

Supplement: s1 [file s1]
